# Supplementary material for: ERβ1 Sensitizes and ERβ2 Desensitizes ERα-Positive Breast Cancer Cells to the Inhibitory Effects of Tamoxifen, Fulvestrant and Their Combination with All-Trans Retinoic Acid
Source: MDPI journal article supplement (doi:10.3390/ijms24043747), 2023-02-13
Supplement: s1 [file s1]

**Figure S1.** Comparison of microarray-assessed and qPCR-assessed mRNA levels

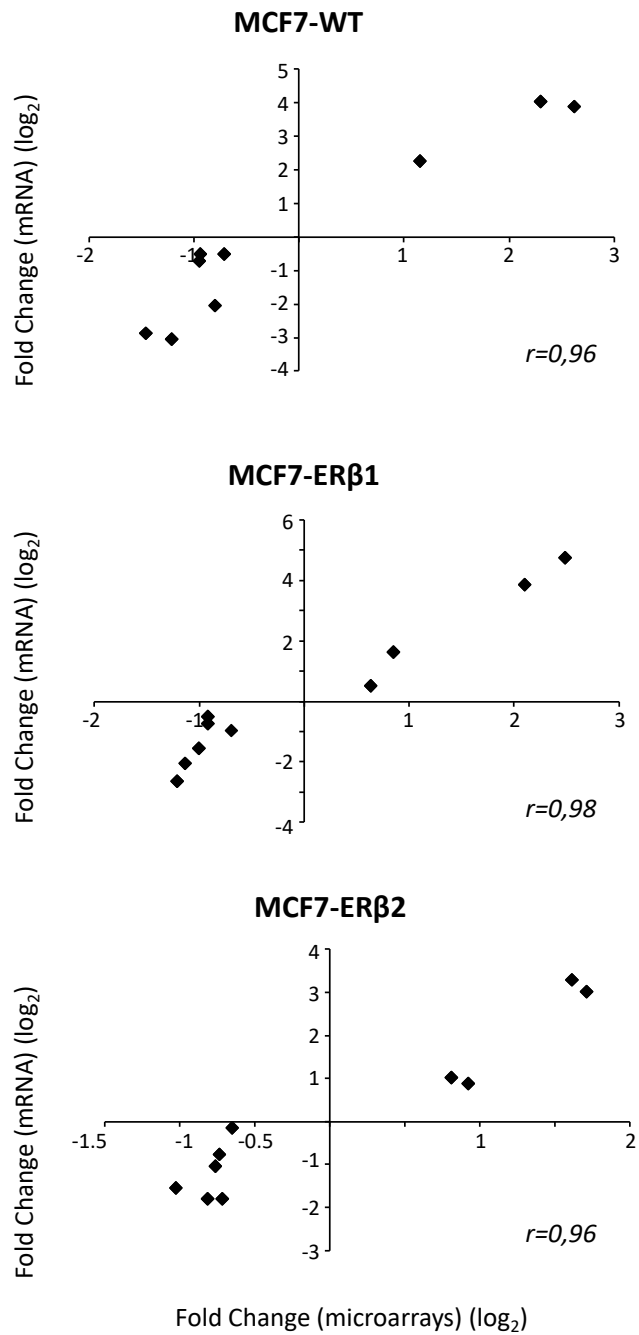

Scatter plots depicting the Pearson correlation ( $r$ ) between changes in mRNA expression levels as assessed by qPCR (y-axis) and by microarray-based differential gene expression analysis (x-axis) of 10 randomly selected genes (BMP5, CAV1, ESR1, HOXA5, ID2, PGR, PLA2G10, SFN, TGFBI, THBS1) regulated by the combination of OHT and ATRA in MCF7-WT (upper panel), MCF7-ERβ1 (middle panel) and MCF7-ERβ2 cells (lower panel). Changes in mRNA expression levels were expressed as fold induction by the indicated treatment over vehicle (in log<sub>2</sub> scale). OHT, 4-hydroxytamoxifen; ATRA, all-*trans* retinoic acid.
